# Supplementary material for: A Polysaccharide From Eupolyphaga sinensis Walker With Anti-HBV Activities In Vitro and In Vivo
Source: Frontiers journal article supplement (doi:10.3389/fphar.2022.827128), 2022-03-03
Supplement: Data_Sheet_1.PDF [file Data_Sheet_1.PDF]

Figure 1G

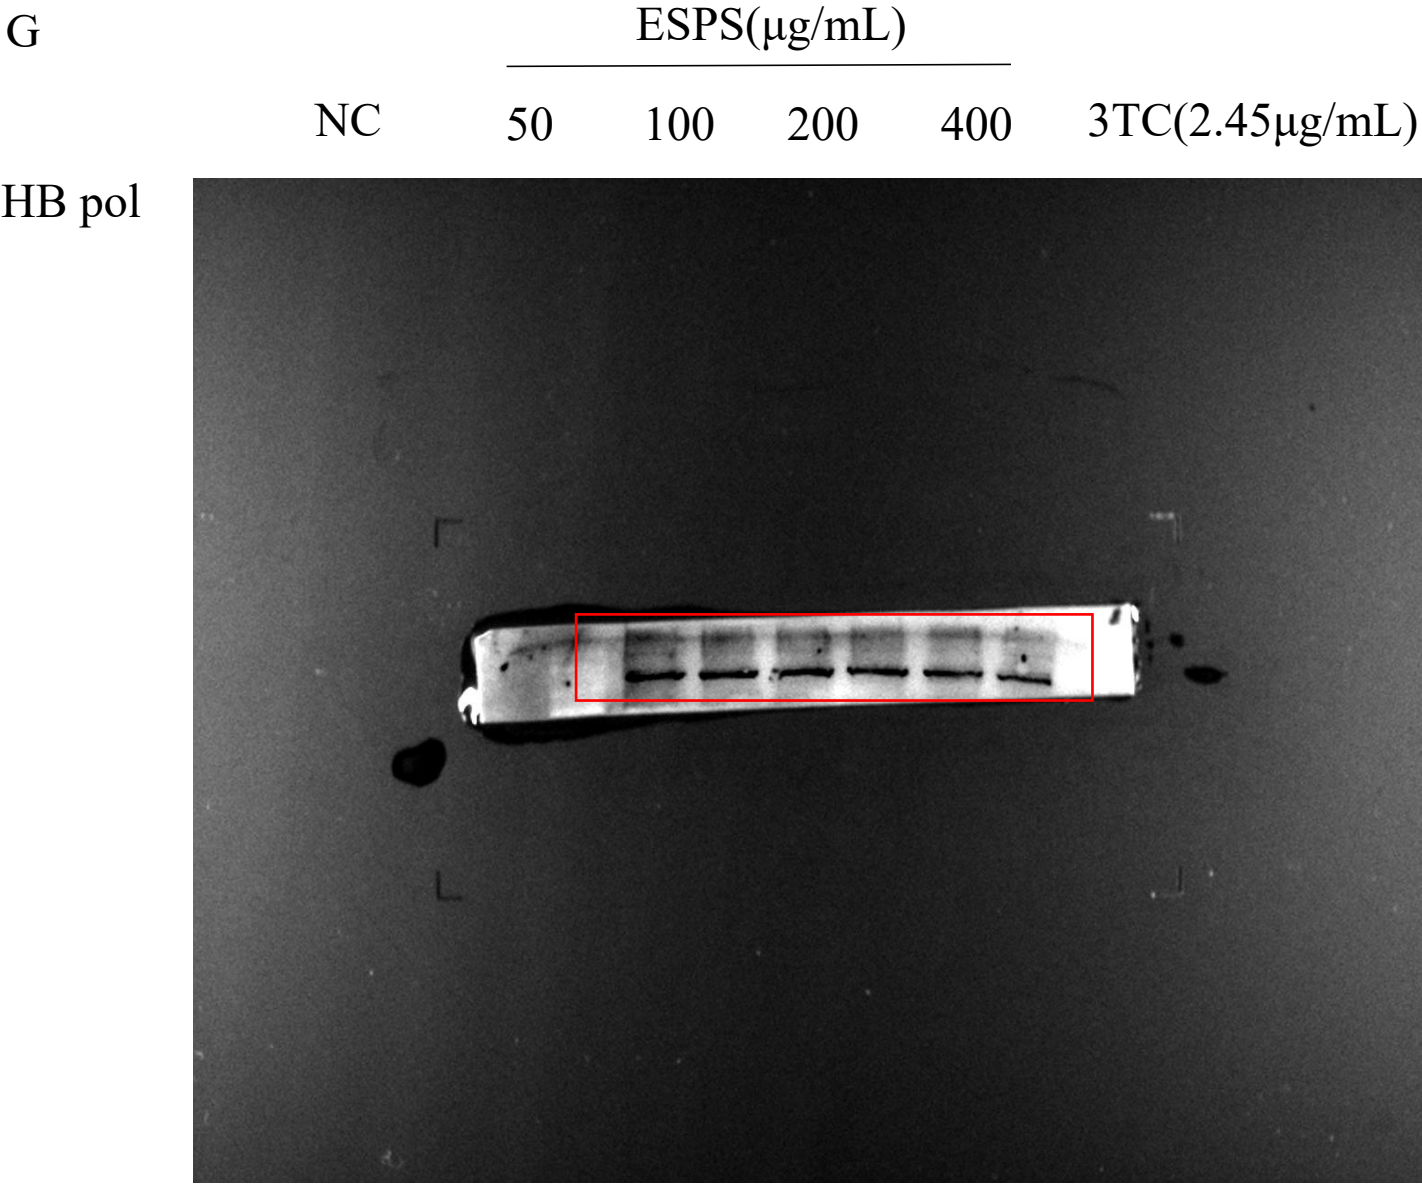

Figure 1G

HB s

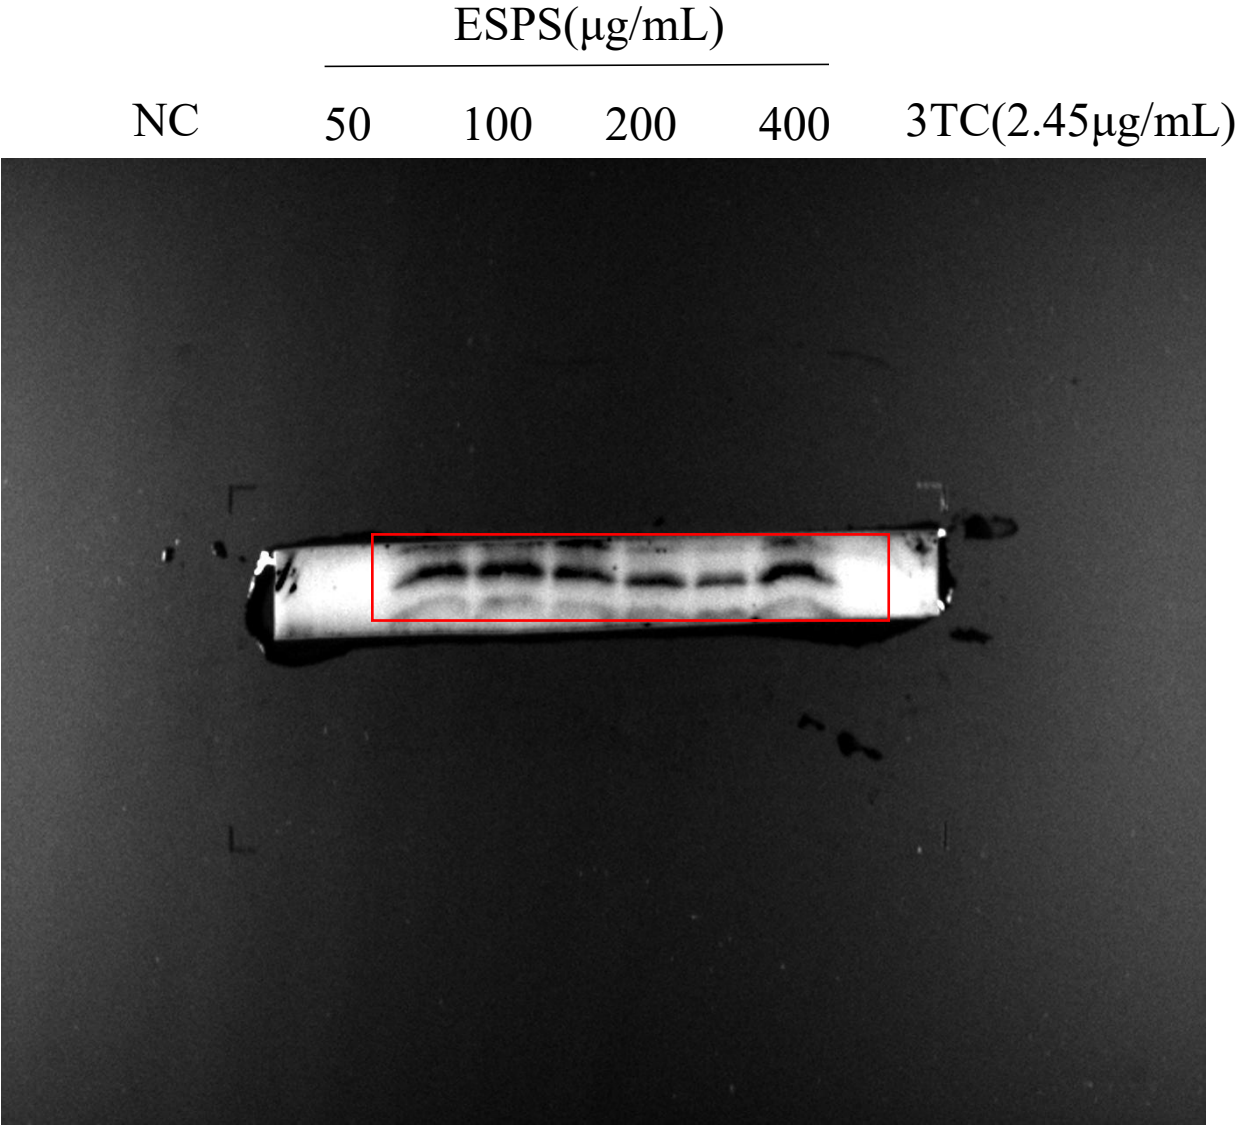

Figure 1G

|    | ESPS( $\mu\text{g/mL}$ ) |     |     |     |                             |
|----|--------------------------|-----|-----|-----|-----------------------------|
| NC | 50                       | 100 | 200 | 400 | 3TC( $2.45\mu\text{g/mL}$ ) |

HB c

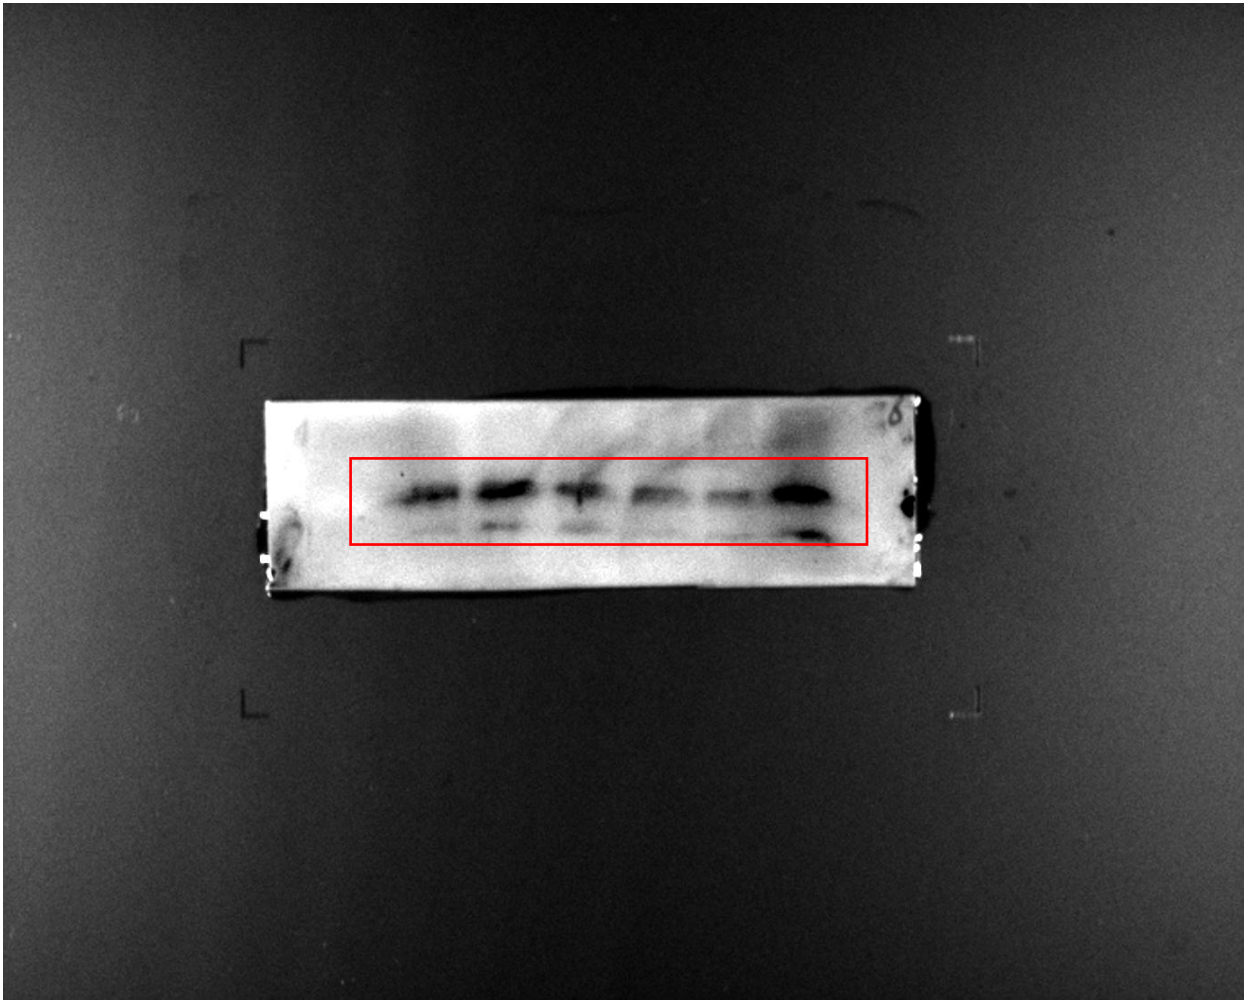

Figure 1G

|    | ESPS( $\mu\text{g/mL}$ ) |     |     |     |                             |
|----|--------------------------|-----|-----|-----|-----------------------------|
| NC | 50                       | 100 | 200 | 400 | 3TC( $2.45\mu\text{g/mL}$ ) |

$\beta$ -actin

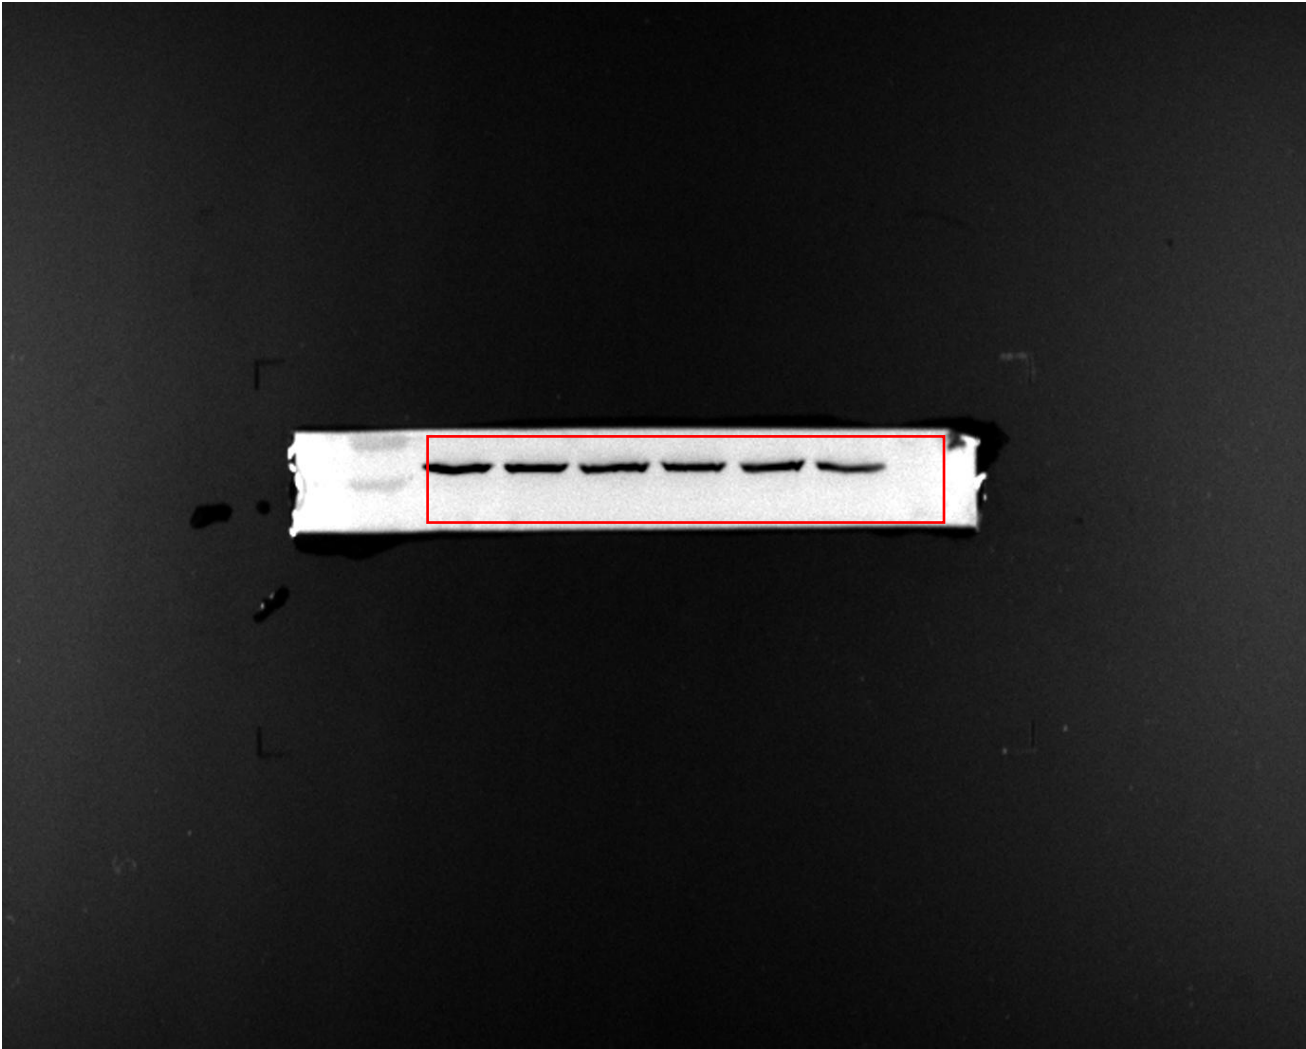



Figure 2A

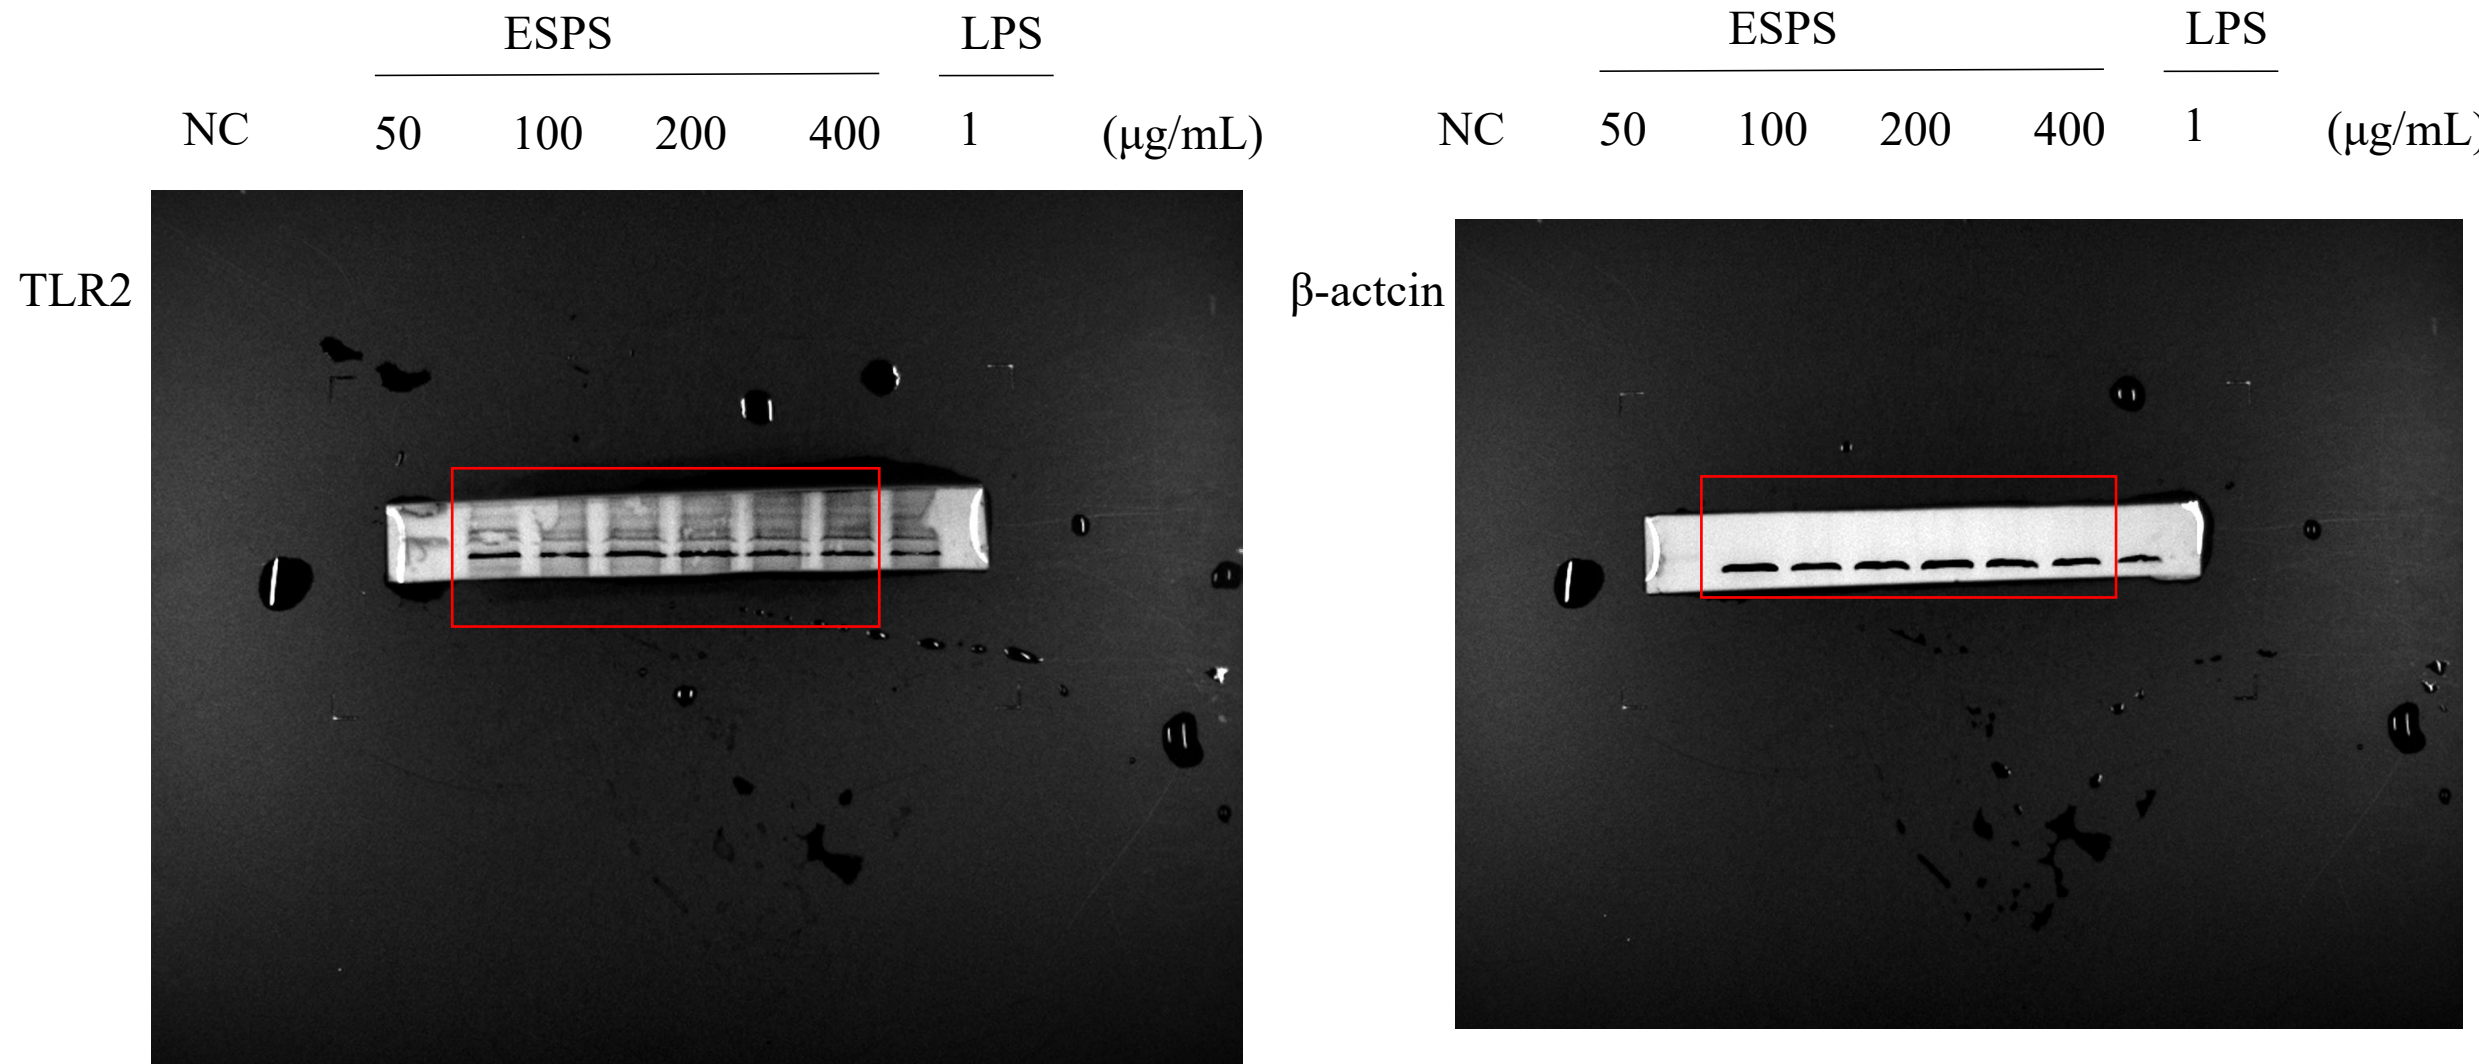

The seventh lane is another polysaccharide named SEP, which was extracted in our lab. Its antiviral effect has been reported and can be used as a positive control, but it is not discussed in this article, so we cut it off.

Figure 2C

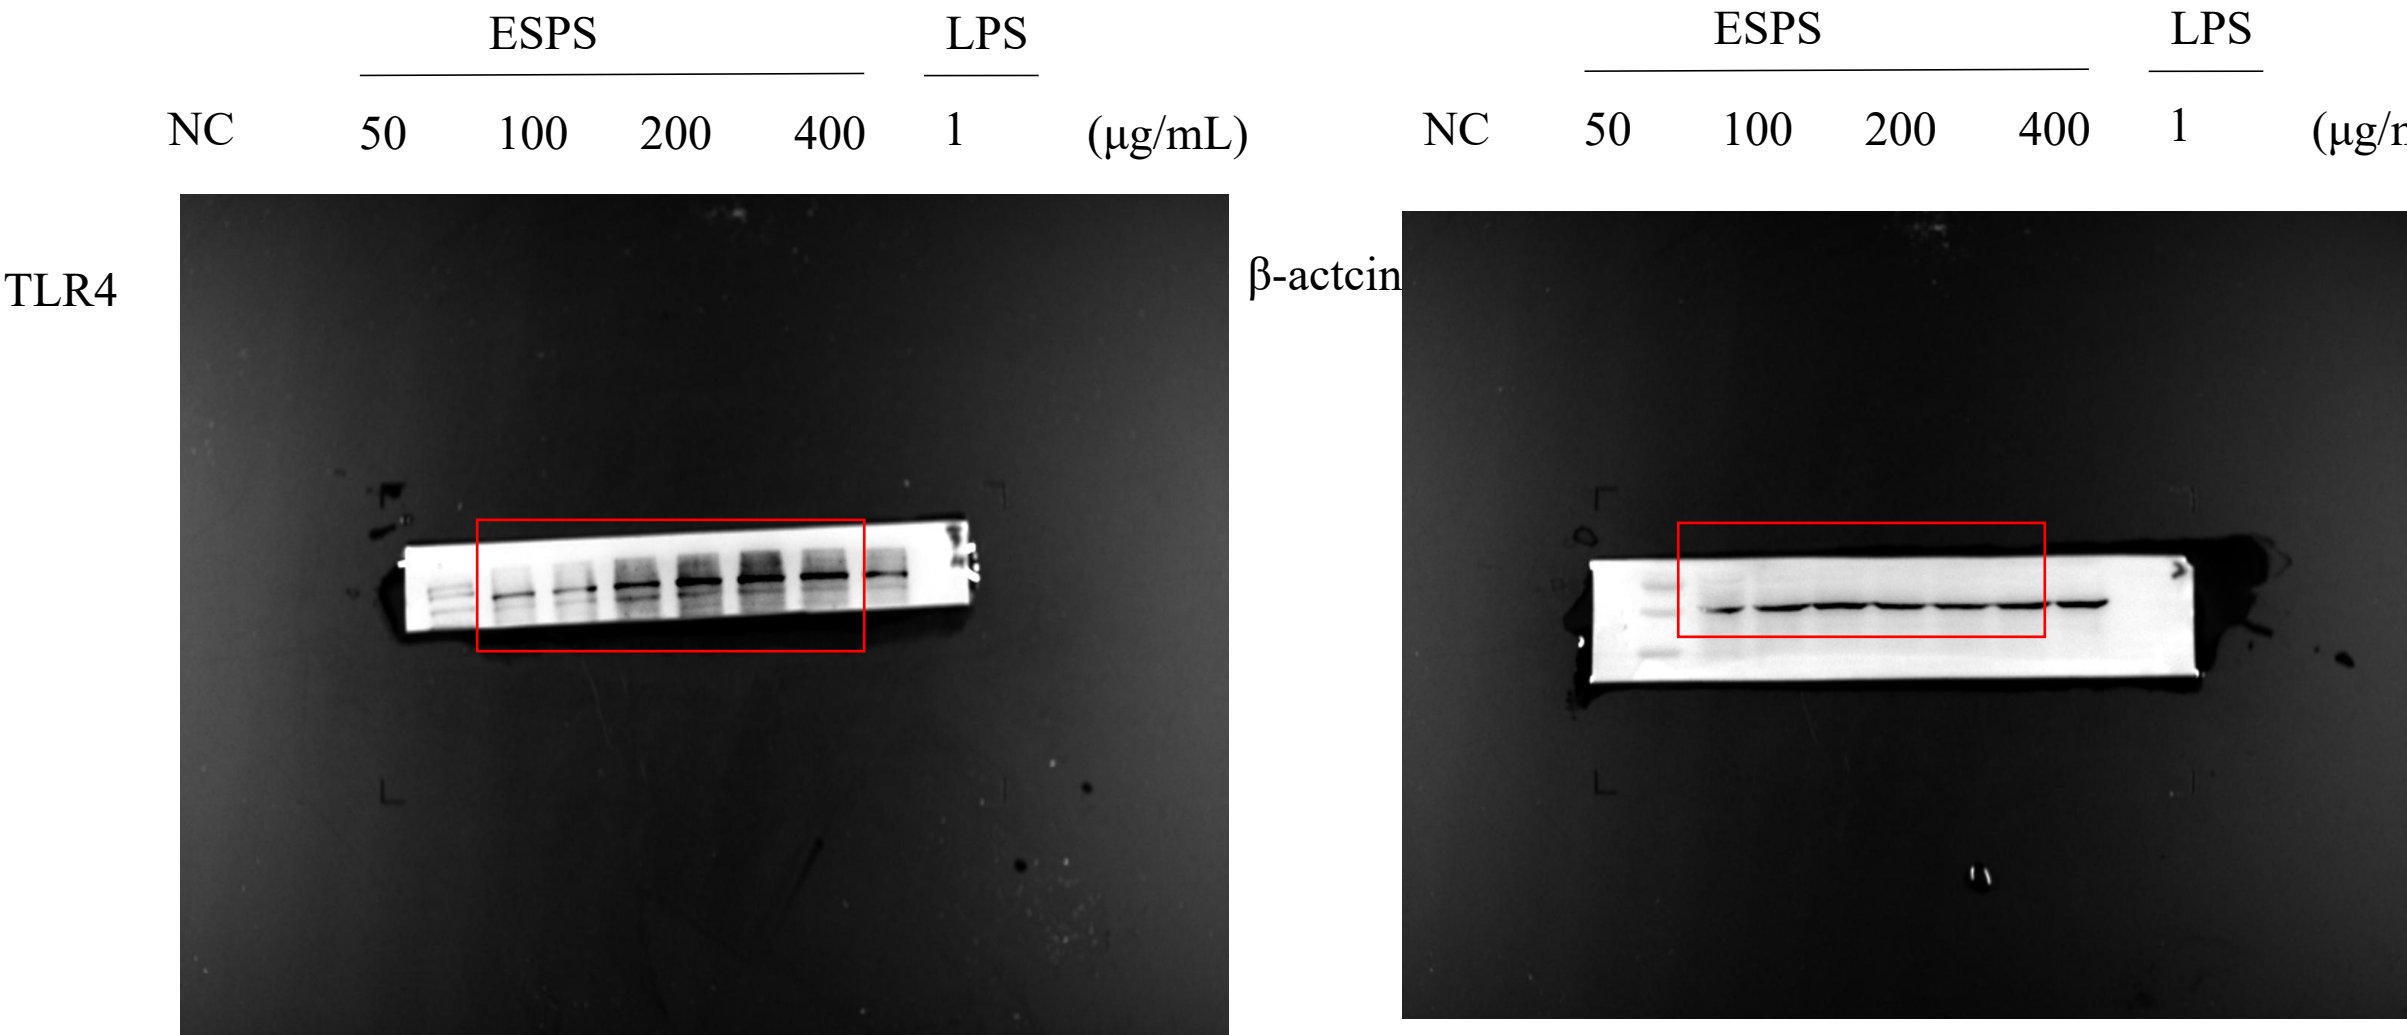

The seventh lane is another polysaccharide named SEP, which was extracted in our lab. Its antiviral effect has been reported and can be used as a positive control, but it is not discussed in this article, so we cut it off.

Figure 3A

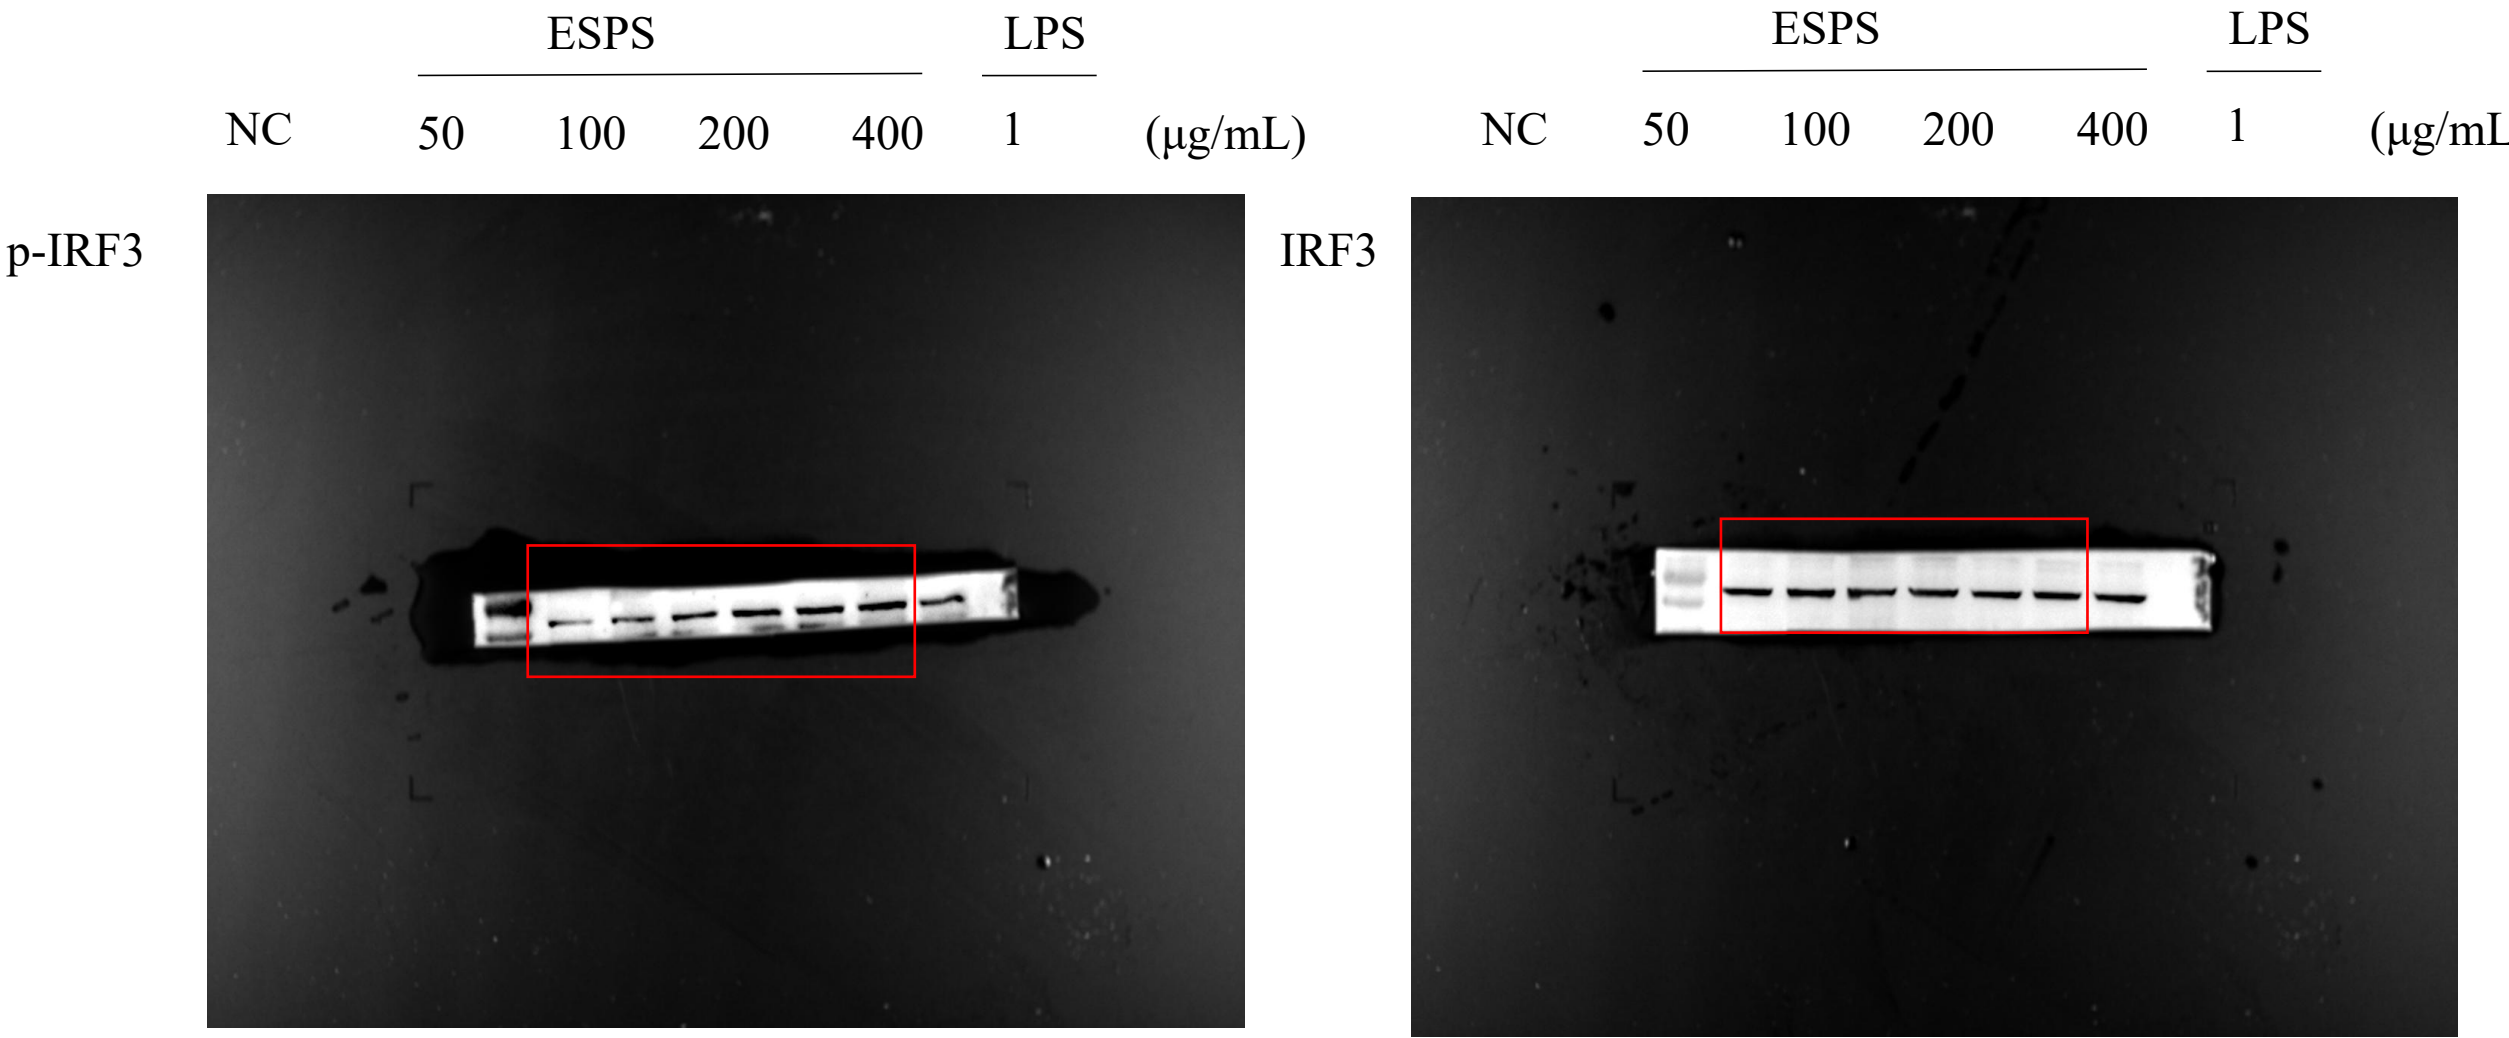

The seventh lane is another polysaccharide named SEP, which was extracted in our lab . Its antiviral effect has been reported and can be used as a positive control, but it is not discussed in this article, so we cut it off.

Figure 3A

|    | ESPS |     |     |     | LPS |         |
|----|------|-----|-----|-----|-----|---------|
|    | 50   | 100 | 200 | 400 | 1   | (μg/mL) |
| NC |      |     |     |     |     |         |

β-actin

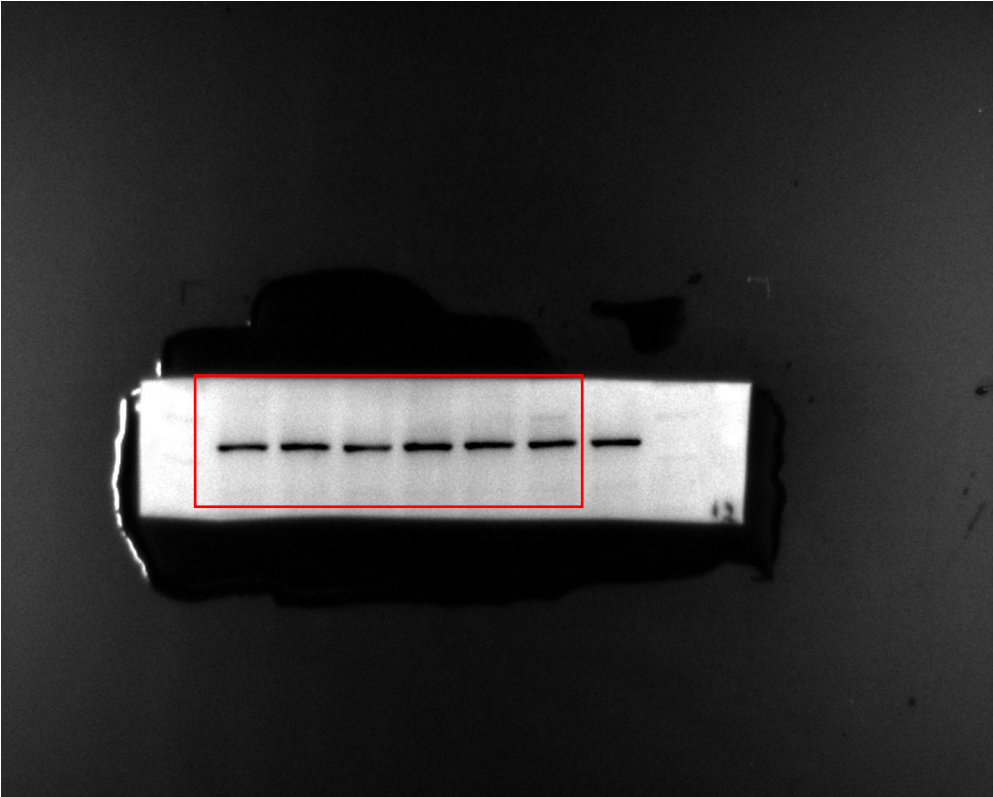

The seventh lane is another polysaccharide named SEP, which was extracted in our lab . Its antiviral effect has been reported and can be used as a positive control, but it is not discussed in this article, so we cut it off.



Figure 4A

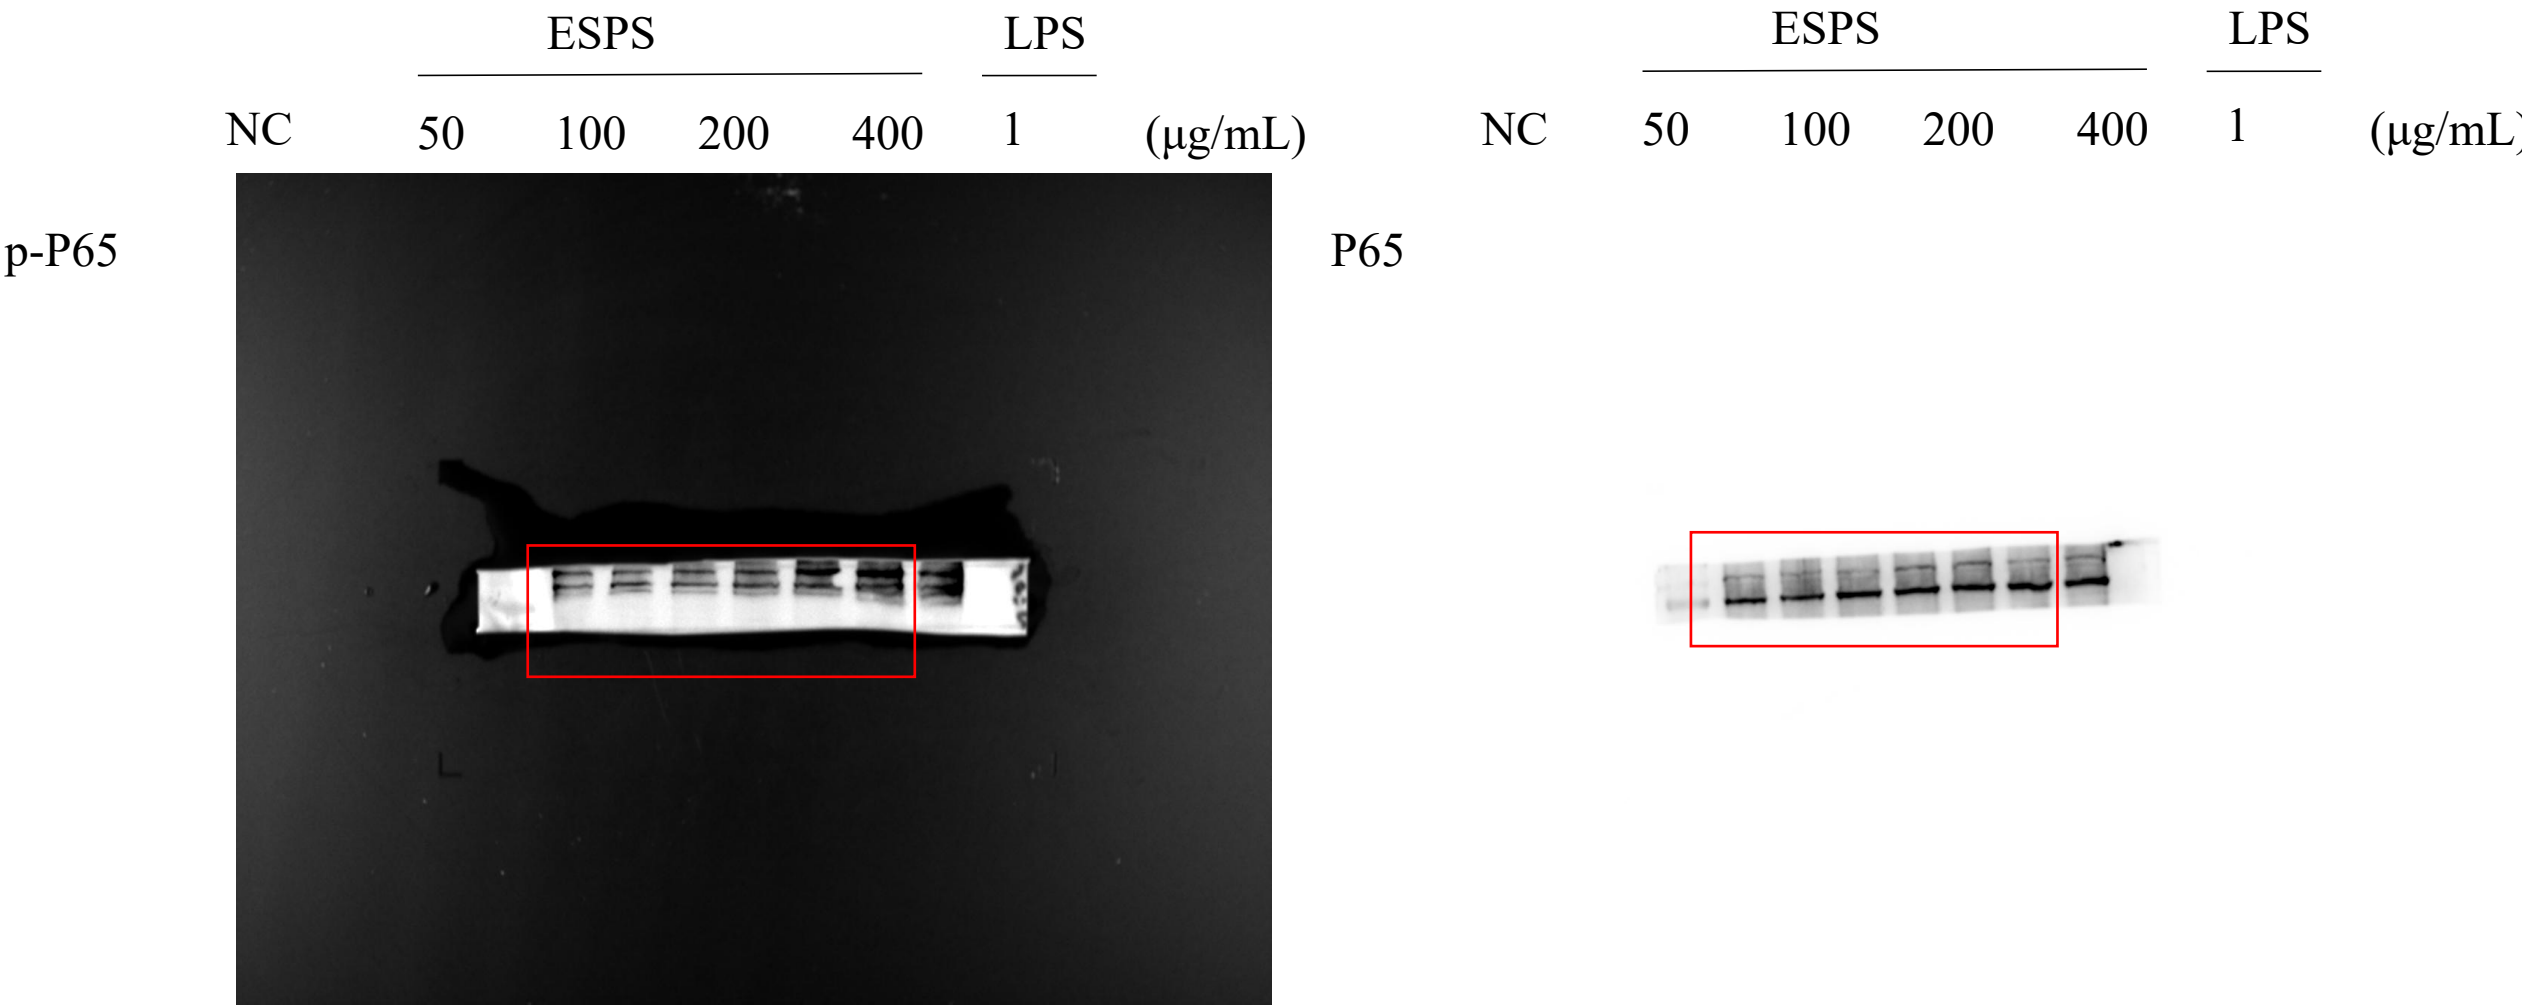

The seventh lane is another polysaccharide named SEP, which was extracted in our lab . Its antiviral effect has been reported and can be used as a positive control, but it is not discussed in this article, so we cut it off.

Figure 4A

|    | ESPS |     |     |     | LPS |                      |
|----|------|-----|-----|-----|-----|----------------------|
| NC | 50   | 100 | 200 | 400 | 1   | ( $\mu\text{g/mL}$ ) |

$\beta$ -actin

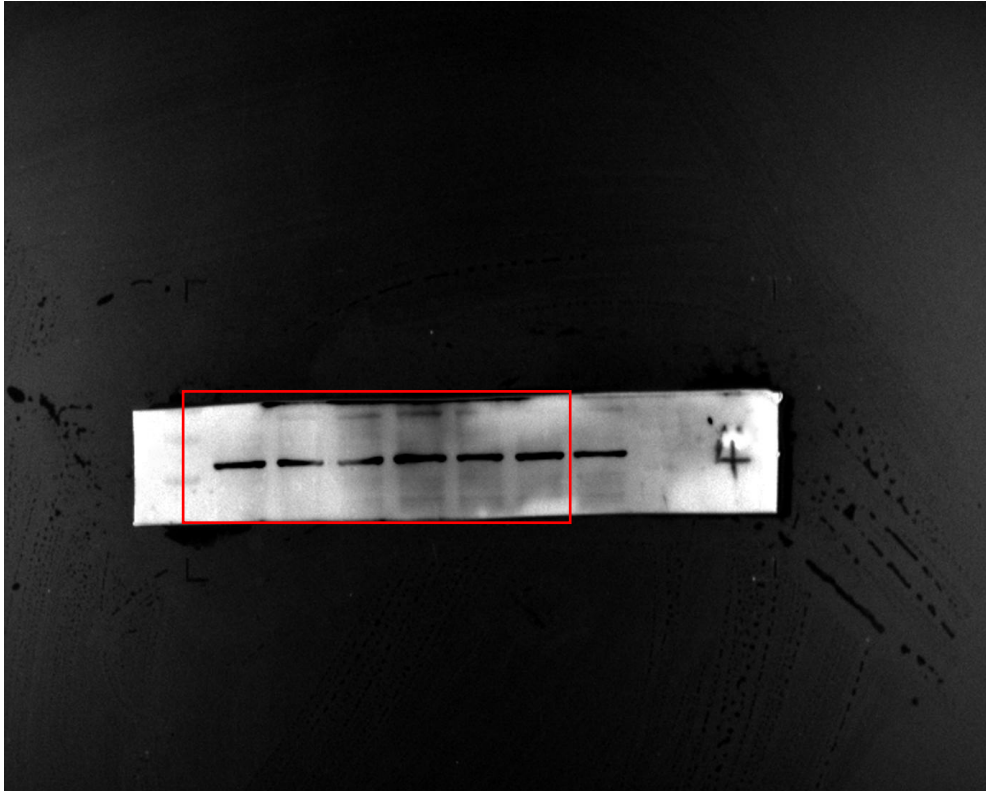

The seventh lane is another polysaccharide named SEP, which was extracted in our lab. Its antiviral effect has been reported and can be used as a positive control, but it is not discussed in this article, so we cut it off.

Figure 4E

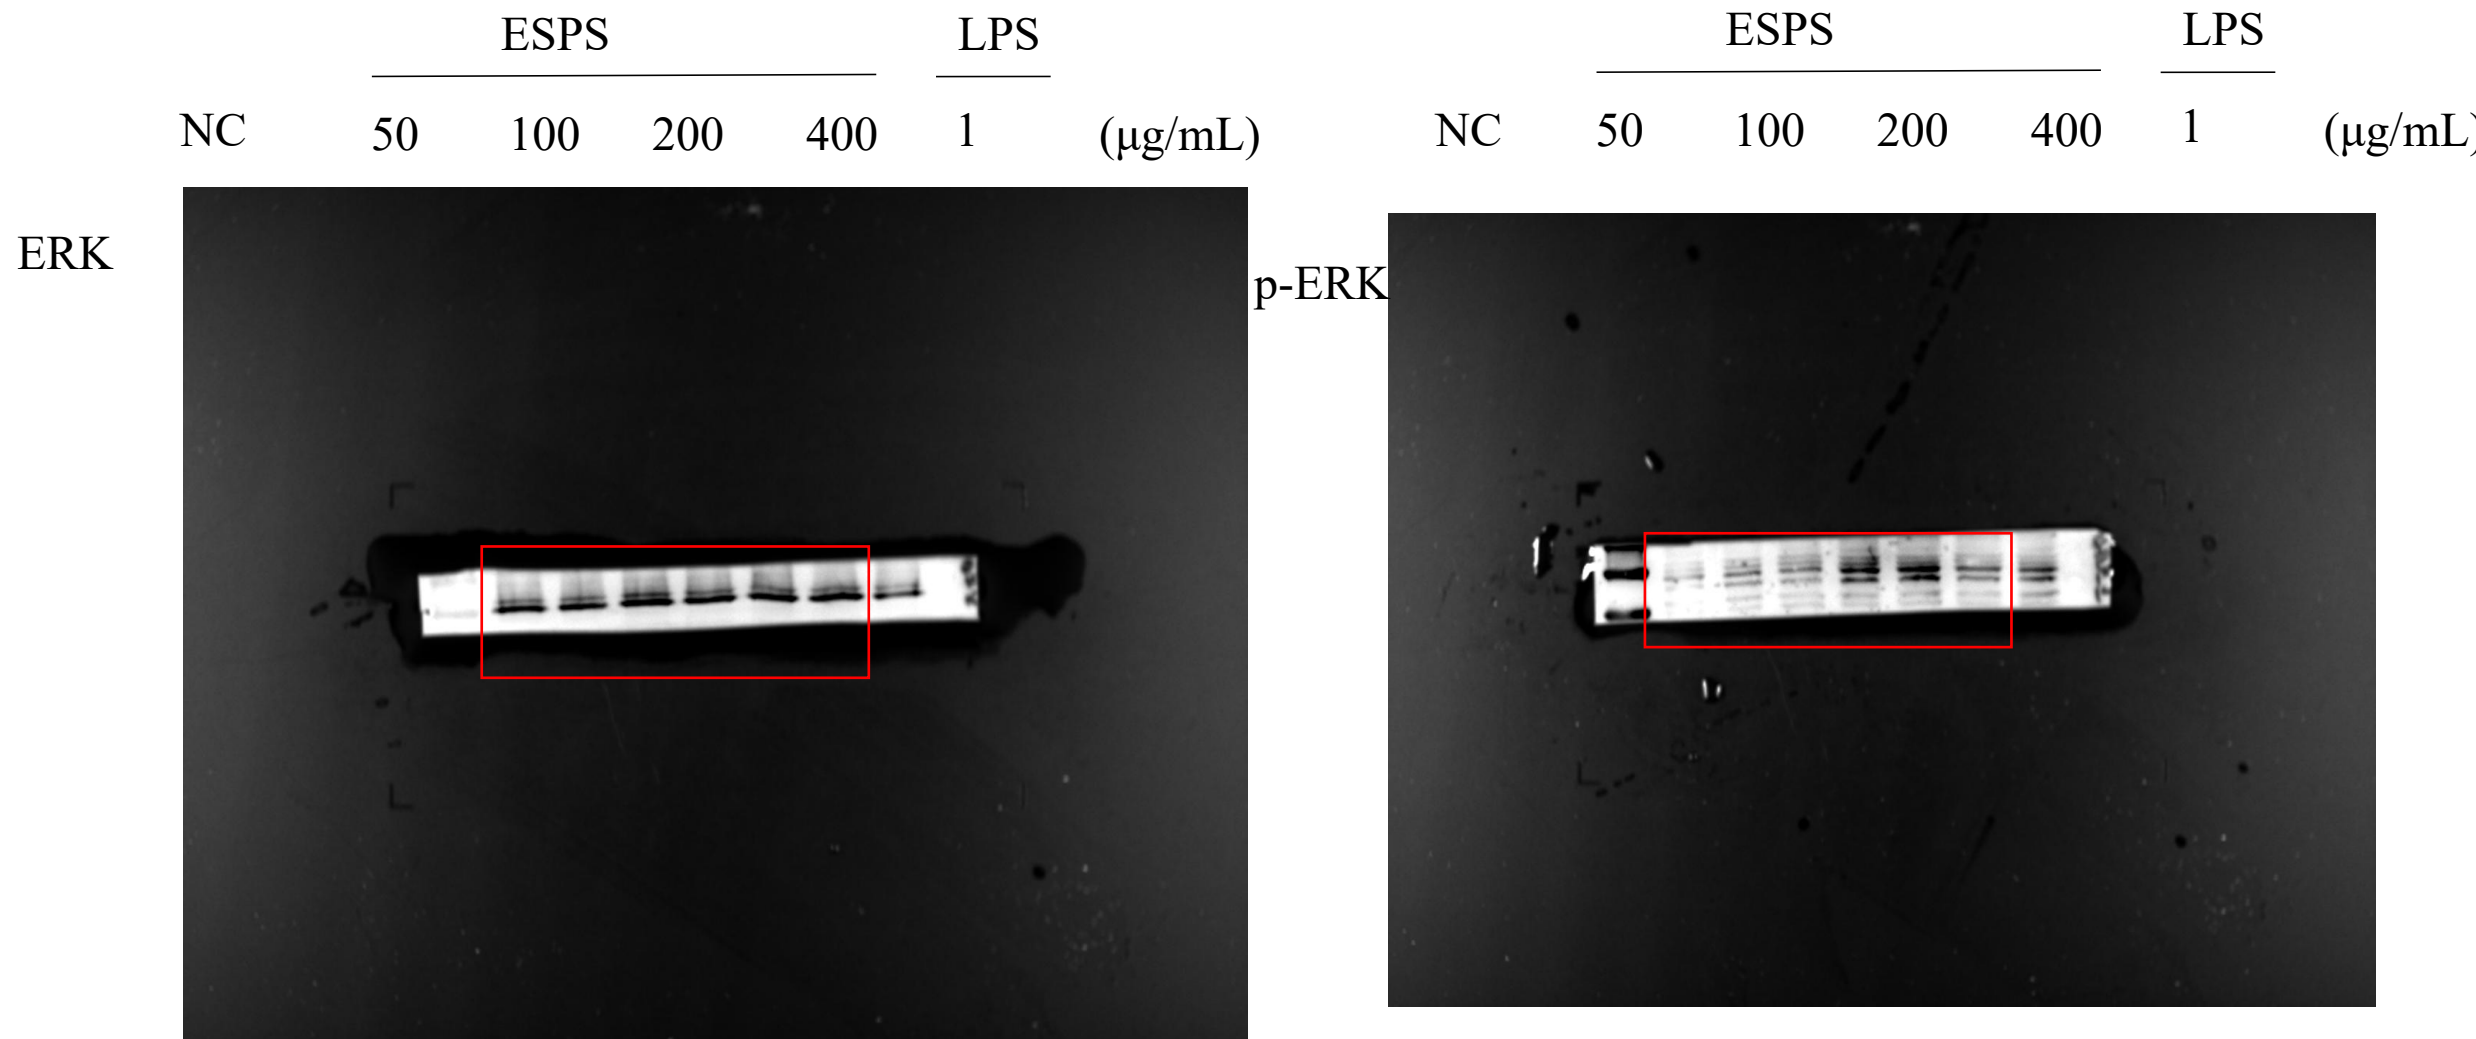

The seventh lane is another polysaccharide named SEP, which was extracted in our lab. Its antiviral effect has been reported and can be used as a positive control, but it is not discussed in this article, so we cut it off.

Figure 4E

|    | ESPS |     |     |     | LPS |                      |
|----|------|-----|-----|-----|-----|----------------------|
| NC | 50   | 100 | 200 | 400 | 1   | ( $\mu\text{g/mL}$ ) |

$\beta$ -actin

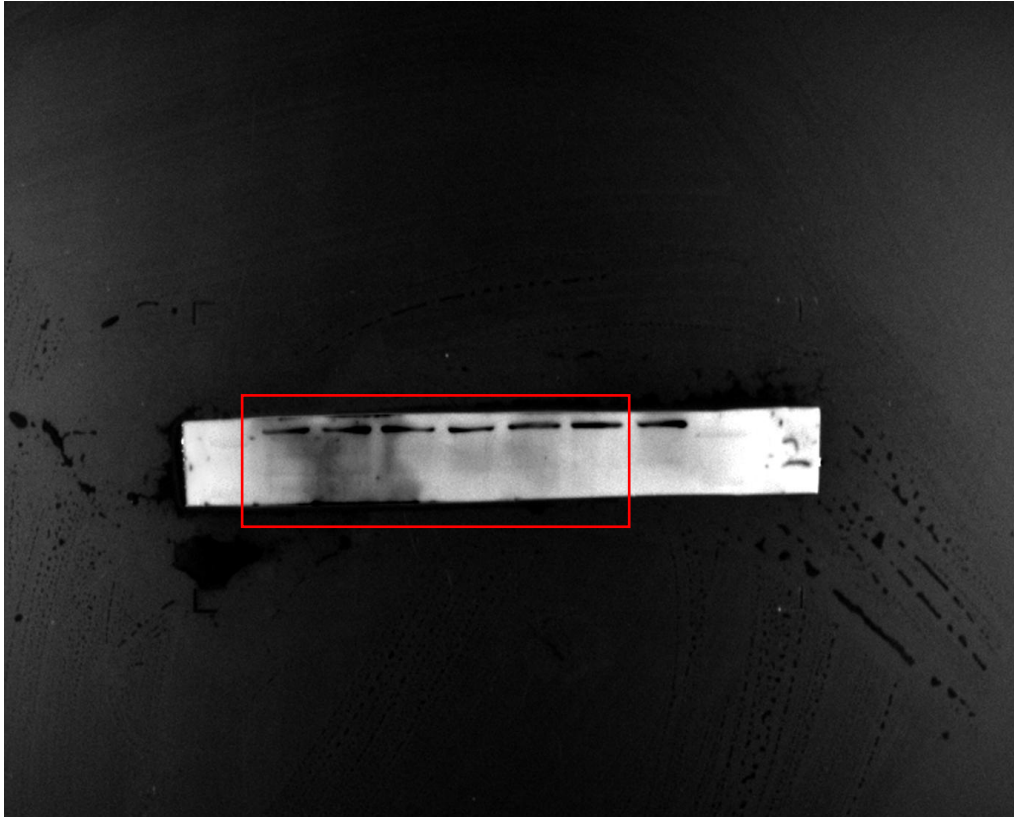

The seventh lane is another polysaccharide named SEP, which was extracted in our lab. Its antiviral effect has been reported and can be used as a positive control, but it is not discussed in this article, so we cut it off.



|    | ESPS |     |     |     |                      |
|----|------|-----|-----|-----|----------------------|
| NC | 50   | 100 | 200 | 400 | ( $\mu\text{g/mL}$ ) |

HNF-4 $\alpha$ 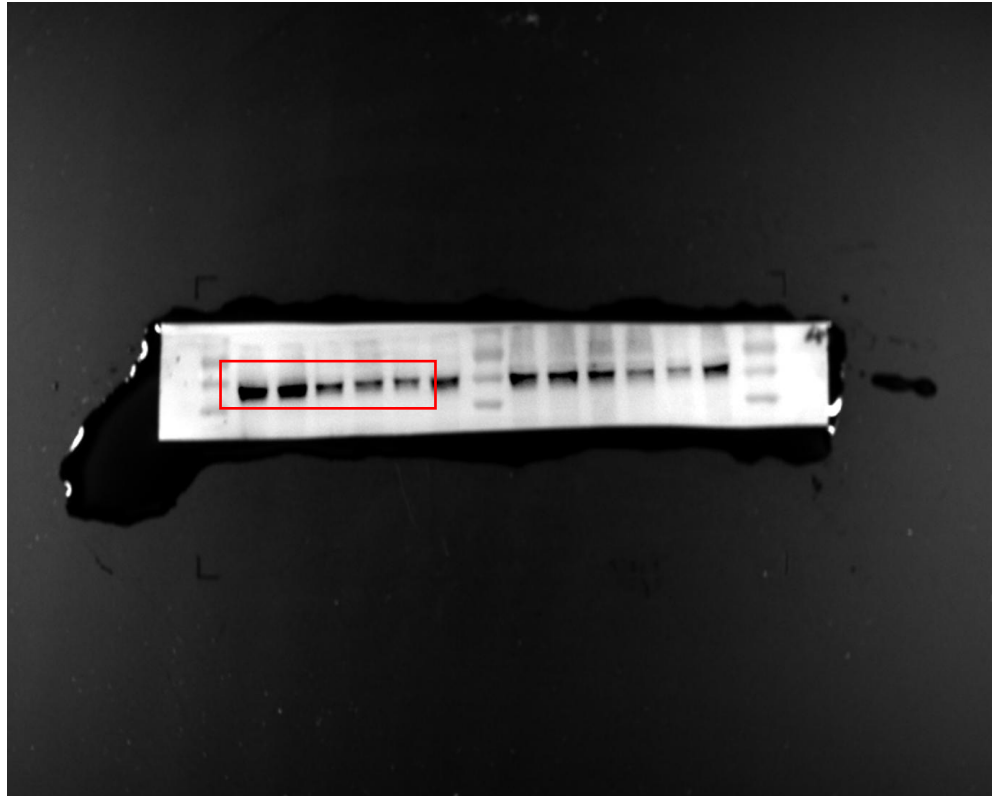 $\beta$ -actin

|    | ESPS |     |     |     |                      |
|----|------|-----|-----|-----|----------------------|
| NC | 50   | 100 | 200 | 400 | ( $\mu\text{g/mL}$ ) |

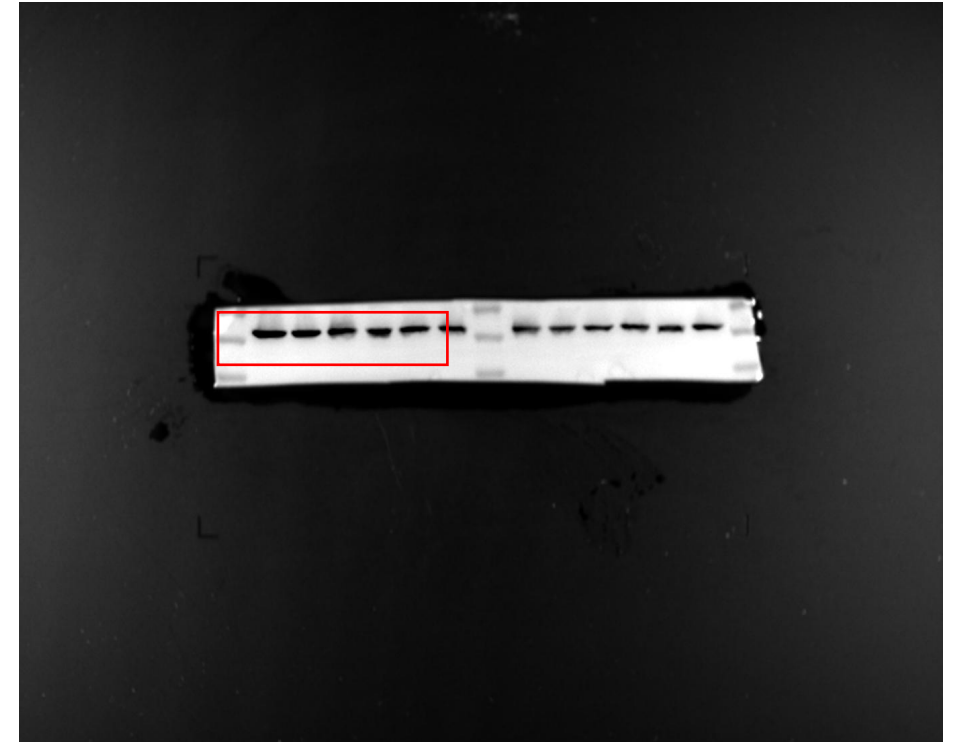

The seventh lane is another polysaccharide named SEP, which was extracted in our lab. Its antiviral effect has been reported and can be used as a positive control, but it is not discussed in this article, so we cut it off.

Figure 4G Huh 7

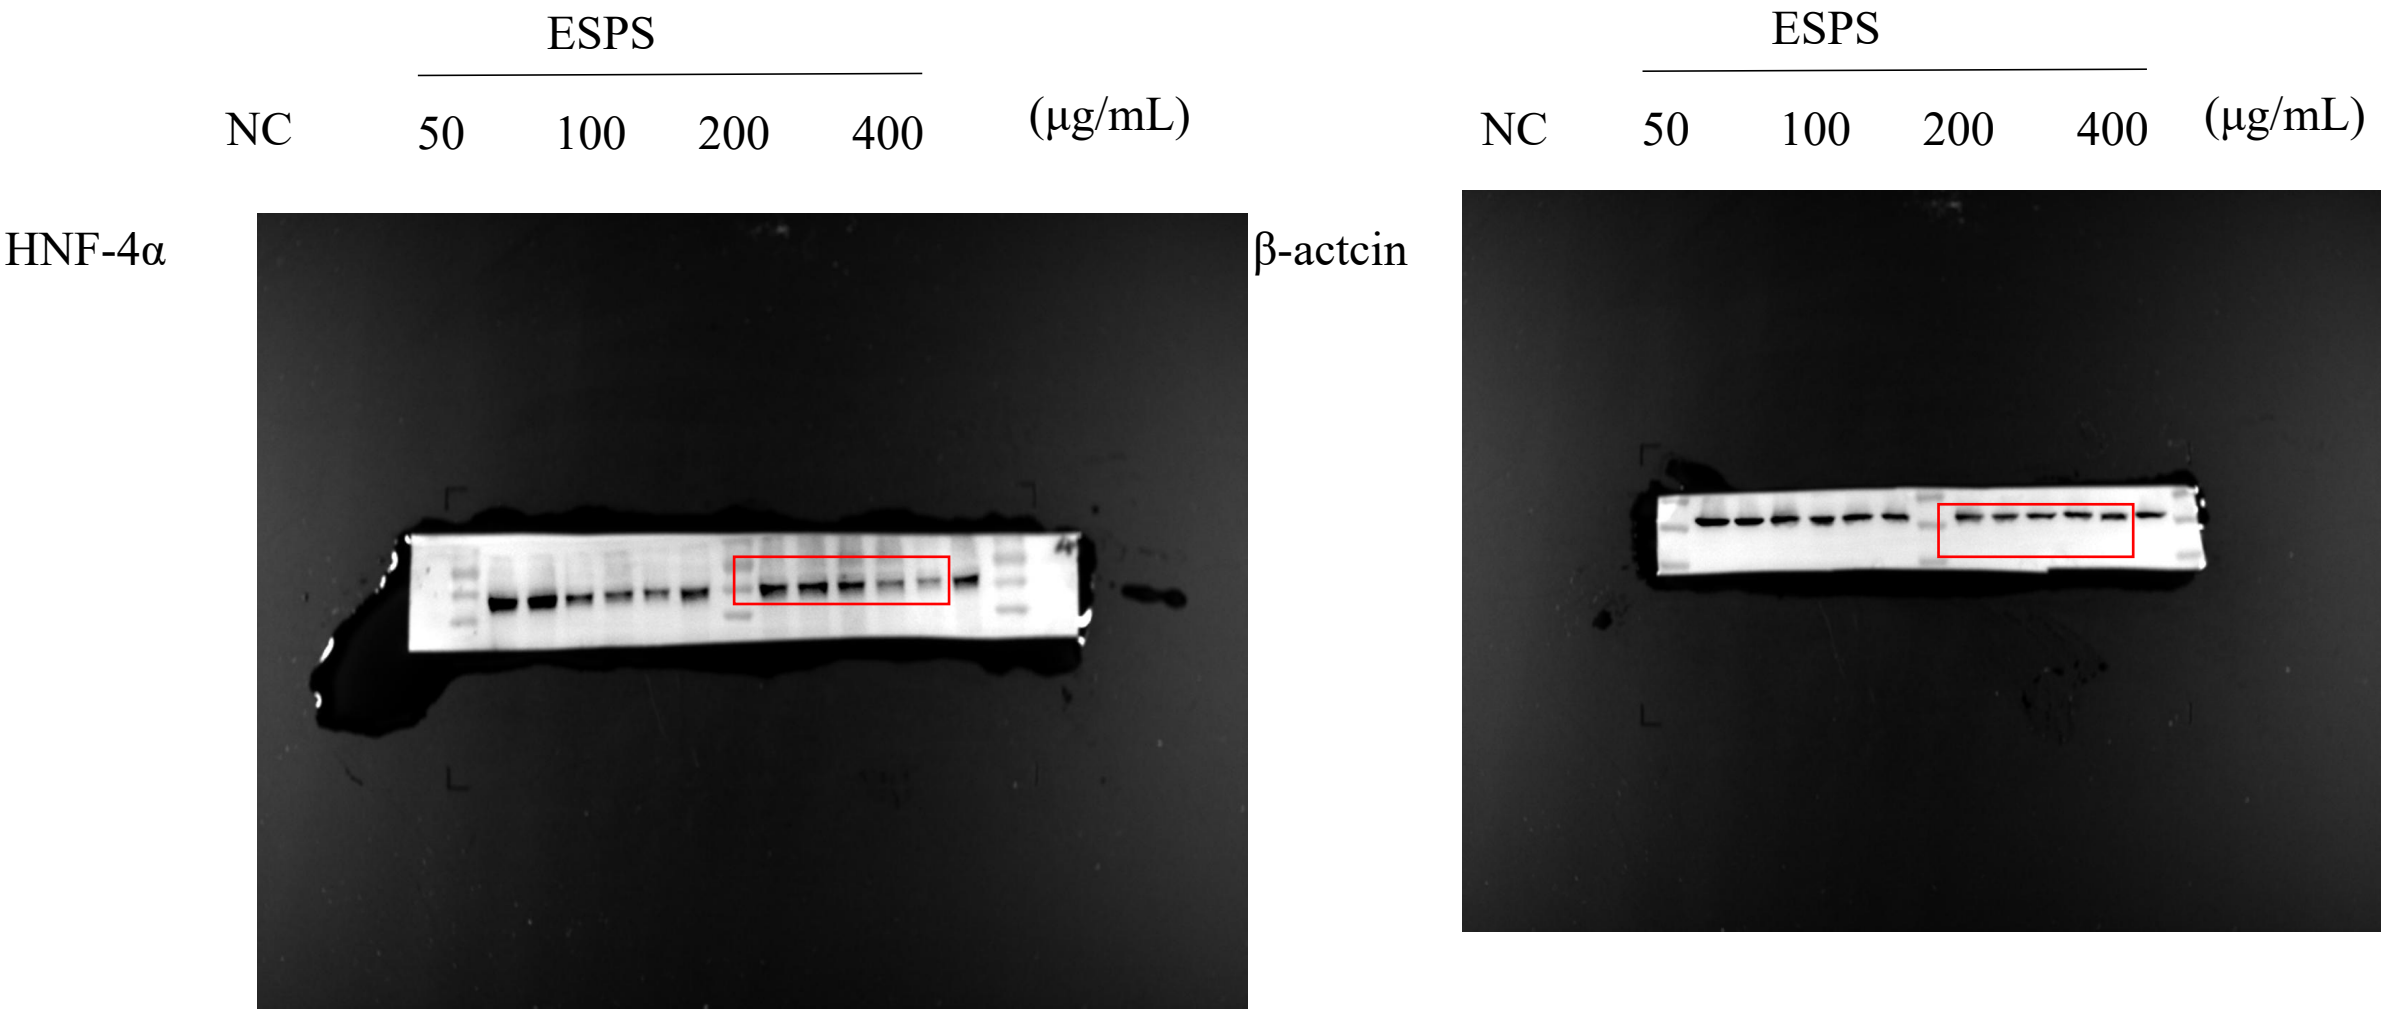

The sixth lane and twelfth lane are another polysaccharide named SEP, which was extracted in our lab. Its antiviral effect has been reported and can be used as a positive control, but it is not discussed in this article, so we cut it off.
